# Supplementary material for: Bridging Gender Gaps in Immunization in Ethiopia: A Life Course and Socio- Ecological Qualitative Study
Source: Research Square preprint supplement (doi:10.21203/rs.3.rs-8235793/v1), 2025-12-30
Supplement: Supplementary file 1 [file e37bf0b62173c6a4b7e6ea36.docx]

IDI Guide For Service Providers

Region: District: Name of Health facility: Date: Name of the interviewer: Name of the note-taker:

Beginning and ending times of interview: /

**Introduction of facilitators and IDI process**

1. The interviewer introduces her(him)self and the note-taker
2. Explains the purpose of the Interview

**Introduction**

*Good Morning/ Afternoon. My Name is .* We are working with Amref health Ethiopia to assess the Gender Dynamics in Immunization aimed at improving Immunization services and Coverage. If you agree, I’d like to ask you just a few questions about immunization and the role of health service providers in Immunization. This should take less than 40 minutes. I will not write your name, and what you as an individual say will not be shared with anyone outside this study.

***Are you willing to answer a few questions? Yes***  ***No*** 

# Theme 1- Experience in providing Vaccine

- 1. What is your position in this health facility? (check one):

Vaccinator Health worker who authorizes vaccinations  Facility Official

- 1. How long have you been working in immunization service provision in this facility/locality?
  2. How do you think most parents in your area feel about vaccination?
  3. How do you express the vaccine coverage and trend?

*Prob: What do you think are the main barriers to achieving high coverage at all ages?*

# Theme 2 - Vaccine Hesitancy and Life-Course immunization

- 1. What do you encounter as the main reason for vaccine hesitancy in the area?
  2. Is life-course immunization a priority for you and for your health facility?

*Prob: Do you discuss life-course immunization with your patients?*

- 1. Does your facility provide information to the public on vaccination and immunization services? Yes  No  [If yes/No] How?/why Not
  2. What gender sensitive innovative communication strategy can be used to disseminate information about vaccines to different demographic groups?

# Gender Barriers to Immunization on the Individual Level and Household Level

- 1. How do women’s and Male’s roles in the community affect immunization?
  2. In your experience in the area, who do you think usually makes decisions about children’s immunization?
  3. What interventions could empower women to have a stronger voice in decision-making about their children’s immunization/health?
  4. Do you think that caretakers trust you and your colleagues (healthcare workers) to safely vaccinate their children?
  5. What initiatives can be introduced to build and sustain trust between the community and healthcare workers?

# Theme 6 - community Level - Influential leaders & gatekeepers influence on Immunization

- 1. Do cultural and religious beliefs in your catchment area influenced vaccination?

Prob. *What are the most common cultural or religious believe that affect immunization? Can you elaborate it with examples?*

- 1. Do you think religious or cultural reasons are the major causes of vaccine hesitancy/resistance in your catchment? Can you elaborate it with examples?
  2. Does your facility involve community leaders and groups in promoting immunization? Yes  No  [If yes] How? [If not] Why not? How are female leaders engaged differently from male leaders?
  3. How can local influencers be utilized to promote positive attitudes towards vaccines?

# Theme 7 - Gender Barrier at Institutional and Policy level

- 1. Do you think vaccinations should be compulsory? How or why not?
  2. What are the programs or policies or things that government has done that stimulate or hinder life-course immunization?.
  3. Are immunization services linked to other healthcare interventions or service delivery? If so, which ones, and how?
  4. Does your clinic implement baby tracking for immunization? If so, how? If not, why not?
  5. What are the things that you think the government still need to do to stimulate life-course immunization?
  6. Are there immunization accountability mechanisms in place on health service provision for your clinic? What are these mechanisms?
  7. Are you and your staffs trained in gender-sensitive communication?

# Theme 8 - Challenges and the way forward

- 1. What are the major challenges in expanding vaccination coverage in the locality?
  2. What need to be done to address these challenges and improve vaccination coverage in the locality??
  3. Do you have *successful intervention in your facility that can be shared for others.*

# Wrap-Up

This concludes our discussion. Is there anything we have not discussed that you would like to mention?

Thank you for your time and information.

IDI Guide for Religious and Community leaders

Region: District: Name of Health facility: Date:

Beginning and ending times of interview: /

Name of the interviewer: Name of the note-taker: Position of person interviewed (check one):

Religious Leader Community Leader 

**Introduction**

*Good Morning/ Afternoon. My Name is .* We are working with Amref health Ethiopia to assess the Gender Dynamics in Immunization aimed at improving Immunization services and Coverage. If you agree, I’d like to ask you just a few questions about immunization and the role of health service providers in Immunization. This should take less than 40 minutes. I will not write your name, and what you as an individual say will not be shared with anyone outside this study.

***Are you willing to answer a few questions? Yes***  ***No*** 

# Thinking and Feeling about Immunization: Tell me how you feel about vaccination. Do you support vaccination?

## Probe:

- - *Why do you feel this way?*
  - *Do you think it’s a good thing? Why?*
  - *Do you think it’s important? Why?*
  - *Is there anything you feel isn’t good about vaccination? Can you tell me more about it?*

# What is your community’s view towards vaccines?

## Probe:

- - *Are there gender-based differences in vaccine acceptance (e.g., mothers vs. fathers)?*
  - *What do you think are the major reasons for that?*

# Do you feel that health facilities near your community provide adequate information to the community members on immunization services?

- - *If yes, how? If no, how could this be improved?*

# Have you ever been involved in immunization related activities before?

## Probe:

- - *If Yes, How? If No, Why Not*
  - *What role do religious groups usual play in vaccination and Expected to play?*
  - *In your opinion, how important is your involvement with immunization in your community? Please explain.*
  - *How do you think community leaders and influencers be engaged to promote vaccination?*

# In your opinion what are the key cultural or religious reasons or other reasons why some children in your community are not immunized?

Prob.

- - *What are the major Reasons for Non-Immunization*
  - *Does your religion prohibit immunization?*
  - *Do you know anyone who does not take a vaccine because of religious/cultural reasons?*
  - *Are there specific vaccines resisted more than others?*

1. **How can local leaders be engaged to change cultural norms that restrict vaccination?**
2. **Are there any community beliefs or practices that shape men’s involvement in children’s health, including vaccine activities? For example, is it socially acceptable for men to take charge of their children’s health?**

## Probe:

- - *What initiatives do you think can encourage and normalize men’s involvement in their children’s health?*
  - *Do men and women in your community have equal decision-making power about child health? If not, how does this affect immunization?"*

1. **What do you think your role should be in encouraging community members to make sure their children are fully immunized?**

Prob: How can religious teachings encourage shared responsibility for child vaccination?"

1. **What support do you need from health facilities to promote immunization?**
2. **What are the things that you think the government still needs to do to stimulate life course immunization?**

# Wrap-Up

This concludes our discussion. Is there anything we have not discussed that you would like to mention?

**Thank you for your time and information.**

**KII- Guide for Government Officials**

Region: District: Name of the organization:

Date: Name of the interviewer:

Beginning and ending times of interview: /

## Introduction of facilitators and IDI process

The interviewer introduces her (him)self and the purpose of the Interview

**Introduction**

*Good Morning/ Afternoon. My Name is .* We are working with Amref health Ethiopia to assess the Gender Dynamics in Immunization aimed at improving Immunization services and Coverage. If you agree, I’d like to ask you just a few questions about immunization and the role of health service providers in Immunization. This should take less than 40 minutes. I will not write your name, and what you as an individual say will not be shared with anyone outside this study.

***Are you willing to answer a few questions? Yes***  ***No*** 

# Experience in providing Vaccine

- 1. How long have you been working in this organization?
  2. How do you explain the vaccine coverage and trend in the district over the years?
  3. What do you think are the main barrier to achieving high coverage at all ages?

# Vaccine Hesitancy and Life-course immunization

- 1. What is the community’s view towards vaccines? Is there any discrimination or hesitancy towards vaccines? What do you think are the reasons for that?
     1. Are there any myths?
     2. What strategies can be used to debunk common myths about vaccines?
  2. Is life-course immunization a priority for you and for your organization? How are you implementing it?

# Gender Barriers to Immunization on the Household Level

- 1. What community patterns do you see in terms of which parent decides whether children get vaccinated, and who takes the child to get vaccinated? How involved are men in their child’s health?
  2. How can men be more involved in their child’s health decisions?
  3. Are you familiar with any programs offered by government, or NGOs that focus on power and gender in household decision-making in relation to vaccination?

# Gender Barriers to Immunization on the Community Level

- 1. Are there any cultural or religious reasons affecting immunization?

Prob: How can local leaders be engaged to change cultural norms that affect vaccination?

- 1. Are there any community beliefs or practices that shape men’s involvement in children’s health?

Prob: What programs can be designed to encourage men to participate in vaccine activities?

# Gender Barriers to Immunization in the Health Facility Level

- 1. Are immunization staffs trained on gender competencies and diversity?
  2. Are there any partnerships supporting vaccination efforts in your locality/district

/region? If so, explain a bit on their area of focus?

Prob: How can existing partnerships be strengthened to better support vaccination efforts?

## Gender Barriers to Immunization on the Institutional, Law, and Policy Level

- 1. What improvements can be made to existing policies or regulatory frameworks on immunization to better address gender inequalities in immunization?
  2. Are there immunization accountability mechanisms in place on health service provision for your clinic? What are these mechanisms?

# Challenges and the way forward

- 1. What are the major challenges in expanding vaccination coverage in the locality?
  2. What need to be done to address these challenges and improve vaccination coverage?
  3. How can gender related gaps be improved to better address gender disparities in life course immunization?

**Wrap-Up:** This concludes our discussion. Is there anything you would like to mention?

Thank you for your time and information.

**Exit Interviews with Caregivers (Only If the Context Allows)**

**Semi-Structured Interview**

Region: District:

Type of Health facility:  Government hospital  Government HC Private facility Other

Type of vaccination site: Outreach site Heath post Health center Hospital Date:

Beginning and ending times of interview: / Name of the interviewer:

# Introduction of facilitators and IDI process

- 1. The moderator introduces her(him)self and the note-taker
  2. Explains the purpose of the Interview

*Approach any caregiver leaving the health facility or outreach site with a child who appears to be younger than 18 months.*

# Introduction

Good Morning/ Afternoon. My Name is . We are working with Amref health Ethiopia to assess the Gender Dynamics in Immunization aimed at improving Immunization services and Coverage. If you agree, I’d like to ask you just a few questions about what happened today at the health facility. This should take less than 30 minutes. I will not write your name or your child’s name, and what you as an individual say will not be shared with anyone outside this study.

***Are you willing to answer a few questions? Yes***  ***No*** 

1. Why did you come here today? For vaccination or Other reasons:
2. Did the child receive one or more vaccinations today? Yes or No

***Prob:*** *If they came for vaccination but the child was not vaccinated, ask about the reason.*

1. How was your waiting experience today? How long did you wait?
2. Did your child receive all of the vaccinations you came for? Yes/No Probe: [If not] Why not?
3. How did the vaccinator treat you?
   - *Prob: Did the vaccinator give you information about the vaccine and additional information about vaccination?*
   - *Prob. About the type and depth of information they received*
4. Do you know when the next vaccine is due? How did you receive this information?
5. Did the vaccinator tell you about how your child might feel after the vaccination? Yes or No [If yes] what did they say to do if your child has some discomfort after the vaccination?
6. Did the vaccinator say anything about your child’s vaccination card/health booklet?

*1. Yes 2.No*

*[If yes] What did they say?*

1. Who decided to bring the child for vaccination today?

*Prob: Was anyone else involved in this decision? If yes, who?*

- - *Who usually takes your child(ren) to have their vaccines?*

1. Is it easy to come to the health facility?

*Prob: Did you lose income or incur travel costs to come here today?*

1. Do you have any questions about vaccination in general or about today’s vaccinations?

1. Yes 2. No

Probe: *[If yes] Did you ask the health worker? Yes/No*

- *[If not] Why not? What would you like to know?*

1. How satisfied are you with the vaccination services would you say? *(Prob: ask them to put it in a scale (very dissatisfied, satisfied, indifference, satisfied to Very satisfied)?*

*Probe: what do you recommend the health facility and the government should do to improve the service?*

**Wrap-Up:** *This concludes our discussion. Is there anything else you would like to mention about your vaccination experience?*

***Thank you for your time and information.***
